# Supplementary material for: Impact of a human gut microbe on Vibrio cholerae host colonization through biofilm enhancement
Source: eLife. 2022 Mar 28;11:e73010. doi: 10.7554/eLife.73010 (PMC8993218; doi:10.7554/eLife.73010)
Supplement: Figure 1—source data 1. [file elife-73010-fig1-data1.xlsx]

## Sheet: All-counts
Taxa	Species	#OTU ID	SMIC.026.02.Day.02	SMIC.037.01.Day.02	SMIC.008.03.Day.02	SMIC.035.03.Day.02	SMIC.031.01.Day.02	SMIC.034.01.Day.02	SMIC.029.01.Day.02	SMIC.009.01.Day.02	SMIC.030.01.Day.02	SMIC.028.02.Day.02	SMIC.022.01.Day.02	SMIC.033.02.Day.02	SMIC.008.02.Day.02	SMIC.026.01.Day.02	SMIC.022.02.Day.02	SMIC.013.01.Day.02	SMIC.042.01.Day.02	SMIC.007.01.Day.02	SMIC.014.03.Day.02	SMIC.016.01.Day.02	SMIC.039.01.Day.02	SMIC.006.01.Day.02	SMIC.041.01.Day.02	SMIC.004.01.Day.02	SMIC.020.01.Day.02	SMIC.036.03.Day.02	SMIC.023.01.Day.02	SMIC.014.02.Day.02	SMIC.016.02.Day.02	SMIC.006.02.Day.02	SMIC.030.04.Day.02	SMIC.029.03.Day.02	SMIC.018.01.Day.02	SMIC.035.01.Day.02	SMIC.037.02.Day.02	SMIC.029.02.Day.02	SMIC.012.02.Day.02	SMIC.001.01.Day.02	SMIC.030.05.Day.02	SMIC.015.01.Day.02	SMIC.034.02.Day.02	SMIC.028.01.Day.02	SMIC.040.02.Day.02	SMIC.009.02.Day.02	SMIC.021.04.Day.02	SMIC.002.01.Day.02	SMIC.021.02.Day.02
k__Bacteria; p__Proteobacteria; c__Gammaproteobacteria; o__Vibrionales; f__Pseudoalteromonadaceae; g__Vibrio; s__cholerae	Vibrio cholerae	4393352	0	0	0	0	0	0	0	0	0	0	0	0	0	0	0	0	0	0	0	0	0	0	0	0	0	0	0	0	0	0	0	0	0	0	0	0	0	1	0	4	10	2	3982	1	40	1	3181
k__Bacteria; p__Proteobacteria; c__Alphaproteobacteria; o__Rhodobacterales; f__Rhodobacteraceae; g__Paracoccus; s__aminovorans	Paracoccus aminovorans	532336	0	0	0	0	0	0	0	0	0	0	0	0	0	0	0	0	0	0	0	0	0	0	0	0	0	0	0	0	0	0	0	0	0	0	0	0	0	0	0	0	0	0	0	0	0	0	0
k__Bacteria; p__Proteobacteria; c__Alphaproteobacteria; o__Rhodobacterales; f__Rhodobacteraceae; g__Paracoccus; s__aminovorans	Paracoccus aminovorans	1797847	0	0	0	0	0	0	0	0	0	0	0	0	0	2	0	0	0	0	0	0	0	0	0	0	0	0	0	0	0	0	0	0	0	0	0	0	0	0	0	0	0	0	0	0	0	0	0
k__Bacteria; p__Proteobacteria; c__Alphaproteobacteria; o__Rhodobacterales; f__Rhodobacteraceae; g__Paracoccus; s__aminovorans	Paracoccus aminovorans	370368	0	0	0	0	0	0	0	0	0	0	0	0	0	0	0	0	0	0	0	0	0	0	0	0	0	0	0	0	0	0	0	0	0	0	0	0	0	0	0	0	0	0	0	0	0	0	0
k__Bacteria; p__Proteobacteria; c__Alphaproteobacteria; o__Rhodobacterales; f__Rhodobacteraceae; g__Paracoccus; s__aminovorans	Paracoccus aminovorans	3468225	0	0	0	0	0	0	0	0	0	0	0	0	0	0	0	0	0	0	0	0	0	0	0	0	0	0	0	0	0	0	0	0	0	0	0	0	0	0	0	0	0	0	1	0	0	0	0
k__Bacteria; p__Proteobacteria; c__Alphaproteobacteria; o__Rhodobacterales; f__Rhodobacteraceae; g__Paracoccus; s__aminovorans	Paracoccus aminovorans	4344483	0	0	0	0	0	0	0	0	0	0	0	0	0	0	0	0	0	0	0	0	0	0	0	0	0	0	0	0	0	0	0	0	0	0	0	0	0	0	0	0	0	0	0	0	0	0	0
k__Bacteria; p__Proteobacteria; c__Alphaproteobacteria; o__Rhodobacterales; f__Rhodobacteraceae; g__Paracoccus; s__aminovorans	Paracoccus aminovorans	245648	0	0	0	0	0	0	0	0	0	0	0	0	0	0	0	0	0	0	0	0	0	0	0	0	0	0	0	0	0	0	0	0	1	0	0	0	0	0	0	0	0	2	0	0	0	0	0
		TOTAL Vc and Pa	0	0	0	0	0	0	0	0	0	0	0	0	0	2	0	0	0	0	0	0	0	0	0	0	0	0	0	0	0	0	0	0	1	0	0	0	0	1	0	4	10	4	3983	1	40	1	3181
		Vc proportion	#DIV/0!	#DIV/0!	#DIV/0!	#DIV/0!	#DIV/0!	#DIV/0!	#DIV/0!	#DIV/0!	#DIV/0!	#DIV/0!	#DIV/0!	#DIV/0!	#DIV/0!	0	#DIV/0!	#DIV/0!	#DIV/0!	#DIV/0!	#DIV/0!	#DIV/0!	#DIV/0!	#DIV/0!	#DIV/0!	#DIV/0!	#DIV/0!	#DIV/0!	#DIV/0!	#DIV/0!	#DIV/0!	#DIV/0!	#DIV/0!	#DIV/0!	0	#DIV/0!	#DIV/0!	#DIV/0!	#DIV/0!	1	#DIV/0!	1	1	0.5	0.999749	1	1	1	1
		Pa proportion	#DIV/0!	#DIV/0!	#DIV/0!	#DIV/0!	#DIV/0!	#DIV/0!	#DIV/0!	#DIV/0!	#DIV/0!	#DIV/0!	#DIV/0!	#DIV/0!	#DIV/0!	1	#DIV/0!	#DIV/0!	#DIV/0!	#DIV/0!	#DIV/0!	#DIV/0!	#DIV/0!	#DIV/0!	#DIV/0!	#DIV/0!	#DIV/0!	#DIV/0!	#DIV/0!	#DIV/0!	#DIV/0!	#DIV/0!	#DIV/0!	#DIV/0!	1	#DIV/0!	#DIV/0!	#DIV/0!	#DIV/0!	0	#DIV/0!	0	0	0.5	0.000251067	0	0	0	0
																x																			x
[truncated: 11 more columns]

## Sheet: Pa.Vc.-counts
TOTAL:	4	3983	4	21	21	2
Vc	0.5	0.999749	0.25	0.809524	0.238095	0.5		0.549561	0.5
Pa	0.5	0.000251067	0.75	0.190476	0.761905	0.5		0.450439	0.5
