# Supplementary material for: Impact of a human gut microbe on Vibrio cholerae host colonization through biofilm enhancement
Source: eLife. 2022 Mar 28;11:e73010. doi: 10.7554/eLife.73010 (PMC8993218; doi:10.7554/eLife.73010)
Supplement: Figure 1—source data 2. [file elife-73010-fig1-data2.xlsx]

## Sheet: Fig 1B
	Vc	Pa
1	0.5	0.5
2	0.999749	0.00025107
3	0.25	0.75
4	0.809524	0.190476
5	0.238095	0.761905
6	0.5	0.5
Avg	0.549561	0.450439
