# Supplementary material for: Impact of a human gut microbe on Vibrio cholerae host colonization through biofilm enhancement
Source: eLife. 2022 Mar 28;11:e73010. doi: 10.7554/eLife.73010 (PMC8993218; doi:10.7554/eLife.73010)
Supplement: Figure 2—figure supplement 1—source data 1. [file elife-73010-fig2-figsupp1-data1.xlsx]

## Sheet: supplementary Fig 1A
	Actinobacteria	Actinobacteria	Actinobacteria	Bacteroidetes	Bacteroidetes	Bacteroidetes	Firmicutes	Firmicutes	Firmicutes	Proteobacteria	Proteobacteria	Proteobacteria	Planctomycetes	Planctomycetes	Planctomycetes	Cyanobacteria	Cyanobacteria	Cyanobacteria	Deferribacteres	Deferribacteres	Deferribacteres	Tenericutes	Tenericutes	Tenericutes	Others	Others	Others
Ctrl	0.0618592	0.0752455	0.0972339	0.0699311	0.0600101	0.0713947	0.198852	0.158776	0.222384	0.578118	0.628733	0.507526	0.0115532	0.0111811	0.0116987	0.0190895	0.0176026	0.0191334	0.0167559	0.0133971	0.0214658	0.0148049	0.013246	0.0181494	0.0284239	0.0204231	0.0301396
Ctrl
Ctrl
Pa	0.0647767	0.0781345	0.0483448	0.0691151	0.0611701	0.0478338	0.194357	0.171873	0.232915	0.582444	0.614683	0.611762	0.0155802	0.0123325	0.00843919	0.0221561	0.016588	0.0137952	0.0114601	0.00949541	0.00792826	0.0135338	0.0116956	0.00976057	0.0261399	0.023478	0.0187283
Pa
Pa
