# Supplementary material for: Impact of a human gut microbe on Vibrio cholerae host colonization through biofilm enhancement
Source: eLife. 2022 Mar 28;11:e73010. doi: 10.7554/eLife.73010 (PMC8993218; doi:10.7554/eLife.73010)
Supplement: Figure 2—figure supplement 1—source data 2. [file elife-73010-fig2-figsupp1-data2.xlsx]

## Sheet: supplementary Fig 1b
	axis1	Ctrl	Pa
Ctrl	-0.158614	-0.010187
Ctrl	-0.042457	0.025288
	-0.084936	0.004207
	-0.009711		0.053028
	-0.005963		-0.072006
	0.301623		-0.000329
