# Supplementary material for: Impact of a human gut microbe on Vibrio cholerae host colonization through biofilm enhancement
Source: eLife. 2022 Mar 28;11:e73010. doi: 10.7554/eLife.73010 (PMC8993218; doi:10.7554/eLife.73010)
Supplement: Figure 2—figure supplement 2—source data 1. [file elife-73010-fig2-figsupp2-data1.xlsx]

## Sheet: Supplmentary Fig 2
	Vc	Vc	Vc	Vc	Vc	Vc	Vc + Pa	Vc + Pa	Vc + Pa	Vc + Pa	Vc + Pa	Vc + Pa
6 Hr	9200	44000	10600	3000	18800	37000	40000	63000	15700	26600	18400	87000
12 Hr	59000	53000	28000	120000	64000	210000	180000	651000	343000	124000	770000	159000
24 Hr	130000	102000	360000	1770000	1010000	970000	7900000	4290000	12500000	5350000	1340000	7740000
