# Supplementary material for: Impact of a human gut microbe on Vibrio cholerae host colonization through biofilm enhancement
Source: eLife. 2022 Mar 28;11:e73010. doi: 10.7554/eLife.73010 (PMC8993218; doi:10.7554/eLife.73010)
Supplement: Figure 2—figure supplement 2—source data 2. [file elife-73010-fig2-figsupp2-data2.xlsx]

## Sheet: Sheet1
	Vc	Pa
M1	40000	1700
M2	63000	8600
M3	15700	2400
M4	26600	1100
M5	18400	1600
M6	87000	6500
