# Supplementary material for: Impact of a human gut microbe on Vibrio cholerae host colonization through biofilm enhancement
Source: eLife. 2022 Mar 28;11:e73010. doi: 10.7554/eLife.73010 (PMC8993218; doi:10.7554/eLife.73010)
Supplement: Figure 2—figure supplement 2—source data 3. [file elife-73010-fig2-figsupp2-data3.xlsx]

## Sheet: Sheet1
	Pa only						Pa + Vc
6 hr	2900	620	810	5000	1480	1710	1700	8600	2400	1100	1600	6500
12 hr	90	20	140	70	160	114	80	153	58	29	113	87
24 hr	0	0	0	0	0	0	0	0	0	0	0	0
