# Supplementary material for: Impact of a human gut microbe on Vibrio cholerae host colonization through biofilm enhancement
Source: eLife. 2022 Mar 28;11:e73010. doi: 10.7554/eLife.73010 (PMC8993218; doi:10.7554/eLife.73010)
Supplement: Figure 2—source data 1. [file elife-73010-fig2-data1.xlsx]

## Sheet: Fig 2A
24 hr	48 hr
3410000	1150000
1140000	1060000
1370000	1860000
1330000	3020000
