# Supplementary material for: Impact of a human gut microbe on Vibrio cholerae host colonization through biofilm enhancement
Source: eLife. 2022 Mar 28;11:e73010. doi: 10.7554/eLife.73010 (PMC8993218; doi:10.7554/eLife.73010)
Supplement: Figure 2—source data 2. [file elife-73010-fig2-data2.xlsx]

## Sheet: Fig 2B
Vc	Vc + Pa
67000	1730000
960000	670000
150000	490000
230000	820000
330000	2780000
1160000	7200000
130000	7900000
102000	4290000
360000	12500000
1770000	5350000
1010000	1340000
970000	7740000
3420000	6270000
176000	9080000
	5810000
