# Supplementary material for: Impact of a human gut microbe on Vibrio cholerae host colonization through biofilm enhancement
Source: eLife. 2022 Mar 28;11:e73010. doi: 10.7554/eLife.73010 (PMC8993218; doi:10.7554/eLife.73010)
Supplement: Figure 2—source data 3. [file elife-73010-fig2-data3.xlsx]

## Sheet: Fig 2C
Vc	Vc + Pa
700000	1700000
200000	2600000
470000	6400000
550000	1800000
1130000	1730000
208000	5200000
