# Supplementary material for: Impact of a human gut microbe on Vibrio cholerae host colonization through biofilm enhancement
Source: eLife. 2022 Mar 28;11:e73010. doi: 10.7554/eLife.73010 (PMC8993218; doi:10.7554/eLife.73010)
Supplement: Figure 3—figure supplement 1—source data 1. [file elife-73010-fig3-figsupp1-data1.xlsx]

## Sheet: supplmentary Fig 3
1:10 V.c/P.a	1:10 V.c/HK P.a	V.c
0.789	0.371
0.697	0.387
0.56	0.26
0.455	0.322	0.395
0.49	0.246	0.28
0.598	0.285	0.351
