# Supplementary material for: Impact of a human gut microbe on Vibrio cholerae host colonization through biofilm enhancement
Source: eLife. 2022 Mar 28;11:e73010. doi: 10.7554/eLife.73010 (PMC8993218; doi:10.7554/eLife.73010)
Supplement: Figure 3—figure supplement 1—source data 2. [file elife-73010-fig3-figsupp1-data2.xlsx]

## Sheet: Sheet1
WT	WT+Pa	vpsL/EV +Pa	vpsL/EV+Pa	vpsL/pvpsL	vpsL/pvpsL+Pa
0.543333	2.39433	0.0603333	0.160333	1.16433	2.20333
0.745333	2.12333	0.233333	0.951333	0.620333	2.05933
0.823333	1.77833	0.370333	0.273333	1.73233	2.24733
0.681333	1.67933	0.242333	0.828333	0.771333	2.23533
0.607333	2.02233	0.432333	1.00133	0.796333	2.14733
0.736333	0.950333	0.365333	0.455333	0.955333	1.63033
0.953333	1.71033	0.140333	0.373333	1.29133	1.53033
1.38533	0.821333	0.405333	0.129333	1.44733	1.07033
1.05833	1.12533	0.419333	0.525333	1.34933	1.44033
