# Supplementary material for: Impact of a human gut microbe on Vibrio cholerae host colonization through biofilm enhancement
Source: eLife. 2022 Mar 28;11:e73010. doi: 10.7554/eLife.73010 (PMC8993218; doi:10.7554/eLife.73010)
Supplement: Figure 3—figure supplement 1—source data 3. [file elife-73010-fig3-figsupp1-data3.xlsx]

## Sheet: Sheet1
WT	WT + Pa	WT+ Pa	vpsL/EV	vpsL/EV + Pa	vpsL/EV + Pa	vpsL/pvpsL	vpsL/pvpsL + Pa	vpsL/pvpsL + Pa
566000000	740000000	44800000				406000000	660000000	70400000
424000000	720000000	70400000				564000000	1040000000	147000000
232000000	660000000	51200000				486000000	860000000	64000000
480000000	700000000	64000000				496000000	620000000	68000000
360000000	1060000000	88000000				312000000	700000000	60000000
364000000	900000000	88000000				560000000	860000000	116000000
172000000	500000000	80000000				212000000	860000000	88000000
116000000	280000000	116000000				148000000	600000000	104000000
204000000	740000000	192000000				212000000	680000000	116000000
