# Supplementary material for: Impact of a human gut microbe on Vibrio cholerae host colonization through biofilm enhancement
Source: eLife. 2022 Mar 28;11:e73010. doi: 10.7554/eLife.73010 (PMC8993218; doi:10.7554/eLife.73010)
Supplement: Figure 3—source data 1. [file elife-73010-fig3-data1.xlsx]

## Sheet: Fig 3A
Vc	Pa	Vc( co-culture)	Pa (co-culture)
665000000	64000000	560000000	65000000
940000000	64500000	345000000	55000000
1050000000	43000000	375000000	110000000
540000000	62000000	410000000	155000000
605000000	52000000	365000000	95000000
705000000	63500000	405000000	125000000
