# Supplementary material for: Impact of a human gut microbe on Vibrio cholerae host colonization through biofilm enhancement
Source: eLife. 2022 Mar 28;11:e73010. doi: 10.7554/eLife.73010 (PMC8993218; doi:10.7554/eLife.73010)
Supplement: Figure 3—source data 3. [file elife-73010-fig3-data3.xlsx]

## Sheet: Fig 3C
Vc	Vc (co-culture)	Pa (co-culture)
1400000	170000000	120000000
7700000	180000000	90000000
1100000	180000000	100000000
5800000	280000000	50000000
1900000	110000000	120000000
4400000	160000000	70000000
