# Supplementary material for: Impact of a human gut microbe on Vibrio cholerae host colonization through biofilm enhancement
Source: eLife. 2022 Mar 28;11:e73010. doi: 10.7554/eLife.73010 (PMC8993218; doi:10.7554/eLife.73010)
Supplement: Figure 3—source data 4. [file elife-73010-fig3-data4.xlsx]

## Sheet: Fig 3D
Vc	Vc (co-culture)	Pa (co-culture)
22000	21000	10000
13000	24000	12000
25000	28000	20000
80000	18000	21000
11000	13000	13000
28000	26000	15000
