# Supplementary material for: Impact of a human gut microbe on Vibrio cholerae host colonization through biofilm enhancement
Source: eLife. 2022 Mar 28;11:e73010. doi: 10.7554/eLife.73010 (PMC8993218; doi:10.7554/eLife.73010)
Supplement: Figure 5—source data 1. [file elife-73010-fig5-data1.xlsx]

## Sheet: Fig 5A
Vc	Pa	Pa 10x	Vc + Pa (1:1)	Vc + Pa (1:10)	Vc + HK Pa (1:1)	Vc + HK Pa (1:10)
1.147	0.207	0.295	1.725	2.628	1.115	1.312
0.858	0.241	0.447	1.774	2.258	0.649	0.772
0.926	0.264	0.229	1.246	2.025	1.111	0.74
0.656	0.436	0.531	1.462	2.344	0.985	1.283
0.957	0.625	0.63	1.357	1.935	1.003	0.87
0.794	0.629	0.714	1.814	2.256	0.795	0.945
