# Supplementary material for: Impact of a human gut microbe on Vibrio cholerae host colonization through biofilm enhancement
Source: eLife. 2022 Mar 28;11:e73010. doi: 10.7554/eLife.73010 (PMC8993218; doi:10.7554/eLife.73010)
Supplement: Figure 5—source data 2. [file elife-73010-fig5-data2.xlsx]

## Sheet: Fig 5B
DvpsL	DvpsL + Pa (1:1)	DvpsL + Pa (1:10)	DvpsL + HK Pa (1:1)	DvpsL + HK Pa (1:10)
0.662	0.475	0.449	0.664	0.609
0.58	0.323	0.48	0.618	0.54
0.561	0.661	0.625	0.637	0.535
0.559	0.479	0.552	0.677	0.428
0.465	0.532	0.524	0.489	0.421
0.383	0.698	0.457	0.628	0.395
