# Supplementary material for: Impact of a human gut microbe on Vibrio cholerae host colonization through biofilm enhancement
Source: eLife. 2022 Mar 28;11:e73010. doi: 10.7554/eLife.73010 (PMC8993218; doi:10.7554/eLife.73010)
Supplement: Figure 5—source data 3. [file elife-73010-fig5-data3.xlsx]

## Sheet: Sheet1
-Pa 24hr	+Pa 24	-Pa 48hr	+Pa 48hr	-Pa 72hr	+Pa 72hr
0.7037	32.7241	18.5045	75.3484	57.1284	108.837
1.421	14.1425	40.2997	82.5911	90.3709	54.4787
0.832603	1.59885	0.791732	69.8883	58.3384	65.0488
1.04246	2.02311	58.0153	166.293	114.942	40.0523
1.15214	0.942681	3.83915	82.6261	144.193
