# Supplementary material for: Impact of a human gut microbe on Vibrio cholerae host colonization through biofilm enhancement
Source: eLife. 2022 Mar 28;11:e73010. doi: 10.7554/eLife.73010 (PMC8993218; doi:10.7554/eLife.73010)
Supplement: Figure 7—figure supplement 1—source data 1. [file elife-73010-fig7-figsupp1-data1.xlsx]

## Sheet: Sheet1
tcpA		ctxA
-Pa	+Pa	-Pa	+Pa
0.893909	5.16734	0.868037	4.88
1.11868	3.40087	1.15202	3.27055
0.709445	1.06588	0.58084	1.63712
0.822391	1.65309	1.21715	2.00143
1.71397	0.856118	1.41448	0.948647
