# Supplementary material for: Impact of a human gut microbe on Vibrio cholerae host colonization through biofilm enhancement
Source: eLife. 2022 Mar 28;11:e73010. doi: 10.7554/eLife.73010 (PMC8993218; doi:10.7554/eLife.73010)
Supplement: Figure 7—figure supplement 2—source data 1. [file elife-73010-fig7-figsupp2-data1.xlsx]

## Sheet: Sheet1
vpsL/EV	vpsL/EV +Pa	vpsL/pVpsL	vpsL/pVpsL +Pa
3200000	30000	1710000	10000000
160000	1370000	690000	20000000
400000	1180000	1670000	1280000
69000	1940000	36000	3930000
9000	2450000	3300000	21500000
65800000	16700000	420000	450000
2300000	10000	1740000	6800000
15800000	47900000	1720000	1350000
69000000	70000	250000	90000
540000	700000	230000	6400000
2900000	58800000	190000	194000000
11200000	13700000	2400000	1900000
	3200000	40000	360000
	510000	9900000	13000000
		60000	490000
		420000	120000
		430000	460000
		50000	190000
