# Supplementary material for: Impact of a human gut microbe on Vibrio cholerae host colonization through biofilm enhancement
Source: eLife. 2022 Mar 28;11:e73010. doi: 10.7554/eLife.73010 (PMC8993218; doi:10.7554/eLife.73010)
Supplement: Figure 7—source data 1. [file elife-73010-fig7-data1.xlsx]

## Sheet: Fig 7A
Vc + Pa	Vc	DvpsL	DvpsL + Pa
1730000	67000	1370000	170000
670000	960000	224000	1750000
490000	150000	407000	345000
820000	230000	390000	210000
2780000	330000	4510000	630000
7200000	1160000	85000	3900000
7900000	130000	5280000	9500000
4290000	102000	180000	252000
12500000	360000	380000	3110000
5350000	1770000	171000	350000
1340000	1010000	123000	240000
7740000	970000	360000
6270000	3420000	1130000
9080000	176000
5810000
