# Supplementary material for: Impact of a human gut microbe on Vibrio cholerae host colonization through biofilm enhancement
Source: eLife. 2022 Mar 28;11:e73010. doi: 10.7554/eLife.73010 (PMC8993218; doi:10.7554/eLife.73010)
Supplement: Figure 7—source data 2. [file elife-73010-fig7-data2.xlsx]

## Sheet: Fig 7B
Vc	Vc + Pa	DvpsL	DvpsL + Pa	DrbmA	DrbmA + Pa	DrbmC Dbap1	DrbmC Dbap1 + Pa
700000	1700000	850000	1600000	500000	160000	600000	1070000
200000	2600000	660000	500000	290000	1800000	1050000	3300000
470000	6400000	1180000	150000	360000	250000	320000	850000
550000	1800000	486000	367000	1690000	200000	260000	590000
1130000	1730000	220000	230000	1200000	340000	710000	1400000
208000	5200000	450000	2170000	310000	510000	540000	2060000
