# Supplementary material for: Impact of a human gut microbe on Vibrio cholerae host colonization through biofilm enhancement
Source: eLife. 2022 Mar 28;11:e73010. doi: 10.7554/eLife.73010 (PMC8993218; doi:10.7554/eLife.73010)
Supplement: Figure 7—source data 3. [file elife-73010-fig7-data3.xlsx]

## Sheet: Fig 7C
Vc	Vc + Pa	DrbmA	DrbmA + Pa	DrbmC Dbap1	DrbmC Dbap1 + Pa
0.062	0.35	0.078	0.306	0	0.004
0.123	0.318	0.14	0.581	0	0
0.063	1.116	0.091	0.342	0	0
0.251	0.509	0.094	0.309	0	0
0.117	0.507	0.101	0.198	0	0
0.117	0.374	0.159	0.257	0.038	0.101
0.082	0.59			0.03	0.065
0.07	0.655			0.038	0.065
0.085	0.647			0.045	0.08
0.072	0.31
0.101	0.361
