# Supplementary material for: Impact of a human gut microbe on Vibrio cholerae host colonization through biofilm enhancement
Source: eLife. 2022 Mar 28;11:e73010. doi: 10.7554/eLife.73010 (PMC8993218; doi:10.7554/eLife.73010)
Supplement: Supplementary file 1. — (a) Operational taxonomic unit raw and normalized abundance of Vibrio cholerae (Vc) in Paracoccus aminovorans (Pa) colonized and Pa noncolonized study participants with Vc infection. (b) Raw and normalized abundance of total, Pa, and Vc operational taxonomic units in all study participants. [file elife-73010-supp1.xlsx]

## Sheet: 1a. Raw and norm abundance
Study ID	Infection Status	Total OTU	Vc OTU	Normalized Vc	Pa OTU	Normalized Pa
1	Uninfected	26587	0	0	0	0
2	Uninfected	38346	0	0	0	0
3	Uninfected	27032	0	0	0	0
4	Uninfected	33296	0	0	0	0
5	Uninfected	37287	0	0	0	0
6	Uninfected	33106	0	0	0	0
7	Uninfected	34077	0	0	0	0
8	Uninfected	28615	0	0	0	0
9	Uninfected	39261	0	0	0	0
10	Uninfected	23315	0	0	0	0
11	Uninfected	36807	0	0	0	0
12	Uninfected	58454	0	0	0	0
13	Uninfected	32291	0	0	0	0
14	Uninfected	36605	0	0	2	5.46373e-05
15	Uninfected	46117	0	0	0	0
16	Uninfected	24020	0	0	0	0
17	Uninfected	26032	0	0	0	0
18	Uninfected	31732	0	0	0	0
19	Uninfected	41599	0	0	0	0
20	Uninfected	37351	0	0	0	0
21	Uninfected	29830	0	0	0	0
22	Uninfected	30765	0	0	0	0
23	Uninfected	34847	0	0	0	0
24	Uninfected	32504	0	0	0	0
25	Uninfected	41196	0	0	0	0
26	Uninfected	26825	0	0	0	0
27	Uninfected	31193	0	0	0	0
28	Uninfected	34064	0	0	0	0
29	Uninfected	18260	0	0	0	0
30	Uninfected	31794	0	0	0	0
31	Uninfected	28331	0	0	0	0
32	Uninfected	28192	0	0	0	0
33	Uninfected	37588	0	0	1	2.66042e-05
34	Uninfected	28496	0	0	0	0
35	Uninfected	37682	0	0	0	0
36	Uninfected	30281	0	0	0	0
1	Infected	25070	0	0	0	0
2	Infected	41062	1	2.43534e-05	0	0
3	Infected	30277	0	0	0	0
4	Infected	56492	4	7.08065e-05	0	0
5	Infected	41762	10	0.000239452	0	0
6	Infected	33675	1	2.96956e-05	0	0
7	Infected	40435	40	0.000989242	0	0
8	Infected	29672	1	3.37018e-05	0	0
9	Infected	36973	3181	0.0860358	0	0
10	Infected	34083	16	0.000469442	0	0
11	Infected	82312	0	0	0	0
12	Infected	25956	0	0	0	0
13	Infected	33671	0	0	0	0
14	Infected	34245	1	2.92013e-05	0	0
15	Infected	24692	0	0	0	0
16	Infected	43543	0	0	0	0
17	Infected	40038	5	0.000124881	16	0.00039962
18	Infected	36332	1	2.75239e-05	1	2.75239e-05
19	Infected	31760	2	6.29723e-05	2	6.29723e-05
20	Infected	38155	3982	0.104364	1	2.62089e-05
21	Infected	35856	1	2.78893e-05	3	8.3668e-05
22	Infected	37897	17	0.000448584	4	0.000105549
Data is derived from Midani 2018, Journal of Infectious Diseases
For more information on individuals listed as "infected" who do not have Vc OTUs detected on sequencing, see Stable 2.

## Sheet: 1b. Vc counts, Pa+ vs Pa-
Study ID	Infection status	VC infection determination	Vc OTUs	Pa OTUs	Total bacterial OTUs	Relative abundance Vc	Relative abundance Pa
1	Infected	culture positive	0	0	25070	0	0
2	Infected	16S positive, seroconversion by vibriocidal titer (4-fold increase in convalescent serum)	1	0	41062	2.43534e-05	0
3	Infected	culture positive	0	0	30277	0	0
4	Infected	16S positive, s+diarrhea	4	0	56492	7.08065e-05	0
5	Infected	16S positive, seroconversion by vibriocidal titer (4-fold increase in convalescent serum)	10	0	41762	0.000239452	0
6	Infected	culture positive	1	0	33675	2.96956e-05	0
7	Infected	16S positive, +diarrhea	40	0	40435	0.000989242	0
8	Infected	16S positive, high baseline vibriocidal titer suggestive of current infection	1	0	29672	3.37018e-05	0
9	Infected	culture positive	3181	0	36973	0.0860358	0
10	Infected	culture positive	16	0	34083	0.000469442	0
11	Infected	culture positive	0	0	82312	0	0
12	Infected	culture positive	0	0	25956	0	0
13	Infected	culture positive	0	0	33671	0	0
14	Infected	culture positive	1	0	34245	2.92013e-05	0
15	Infected	culture positive	0	0	24692	0	0
16	Infected	culture positive	0	0	43543	0	0
17	Infected	culture positive	5	16	40038	0.000124881	0.00039962
18	Infected	16S positive, seroconversion by vibriocidal titer (4-fold increase in convalescent serum)	1	1	36332	2.75239e-05	2.75239e-05
19	Infected	16S positive, seroconversion by vibriocidal titer (4-fold increase in convalescent serum)	2	2	31760	6.29723e-05	6.29723e-05
20	Infected	culture positive	3982	1	38155	0.104364	2.62089e-05
21	Infected	culture positive	1	3	35856	2.78893e-05	8.3668e-05
22	Infected	culture positive	17	4	37897	0.000448584	0.000105549
			average	Std Dev	Mann-Whitney U Test comparison:
Total OTUs in infected persons with no Pa:			38370	14259
Total OTUs in infected persons with Pa:			36673	2826.27
					0.7468
			average	Std Dev	Mann-Whitney U Test comparison:
Relative abundance of Vc in infected persons with no Pa:			0.0054951	0.0214791
Relative abundance of Vc in infected persons with Pa:			0.0175093	0.0425501
					0.1474
Data is derived from Midani 2018, Journal of Infectious Diseases
Culture positive: culture of rectal swab grew Vibrio cholerae. All patients had stool cultures; if no result was listed, culture was negative.
Seroconversion: vibriocidal titer 4-fold increase, comparing between day 0 and day 7 (see Midani 2018 for more information).
