# Supplementary figures and images for: Impact of a human gut microbe on Vibrio cholerae host colonization through biofilm enhancement
Source: eLife journal article supplement (doi:10.7554/elife.73010), 2022-03-28

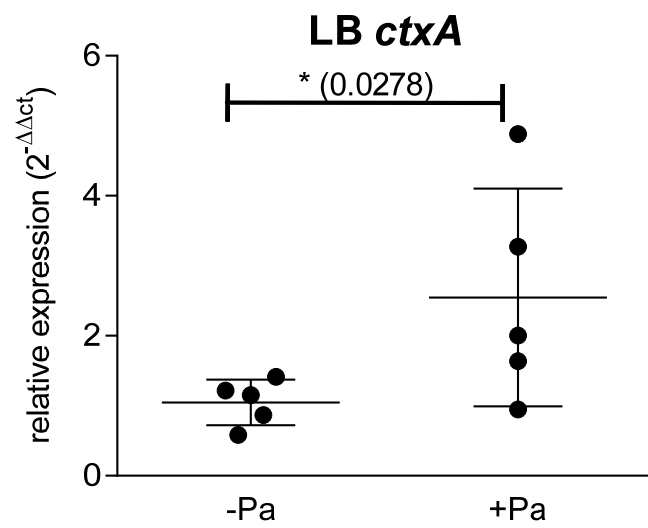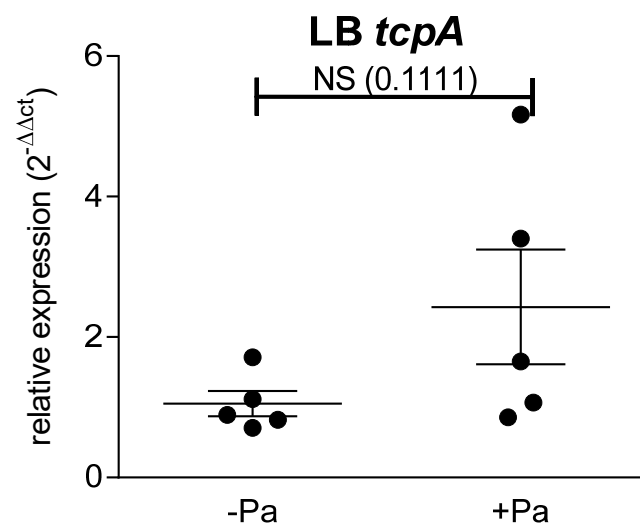

Supplement: supp [file elife-73010-supp-v1.zip]

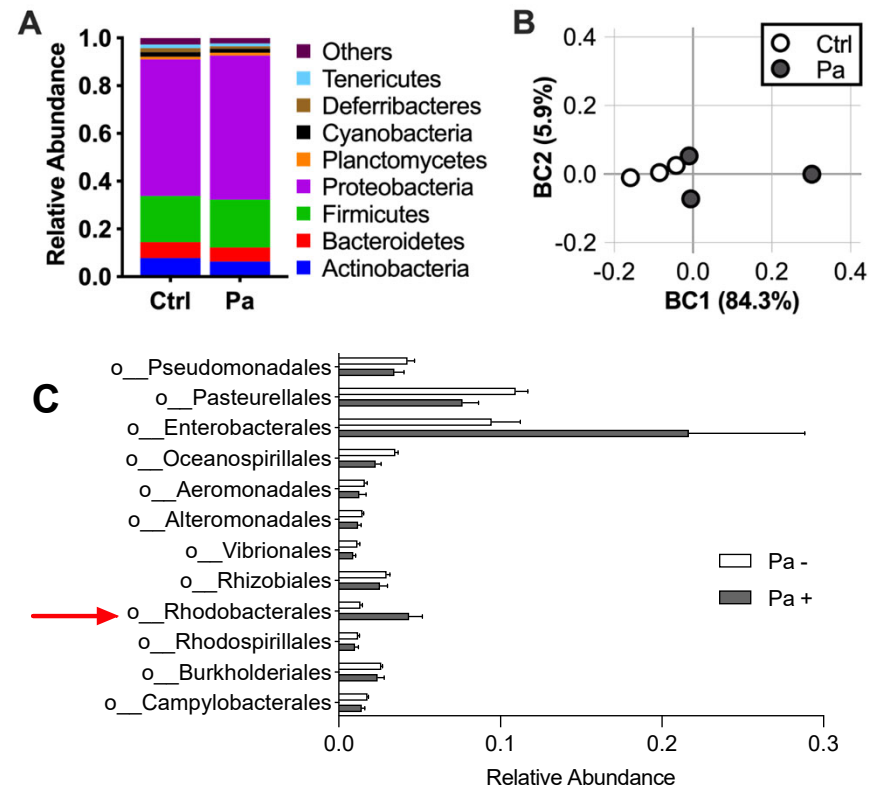

Supplement: supp [file elife-73010-supp-v1.zip]

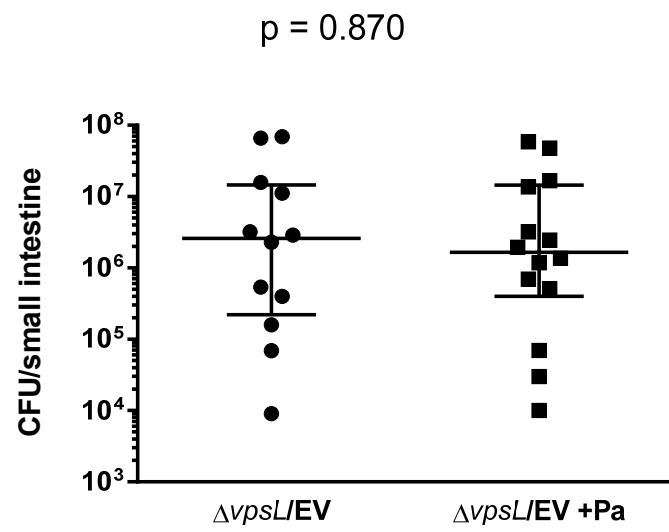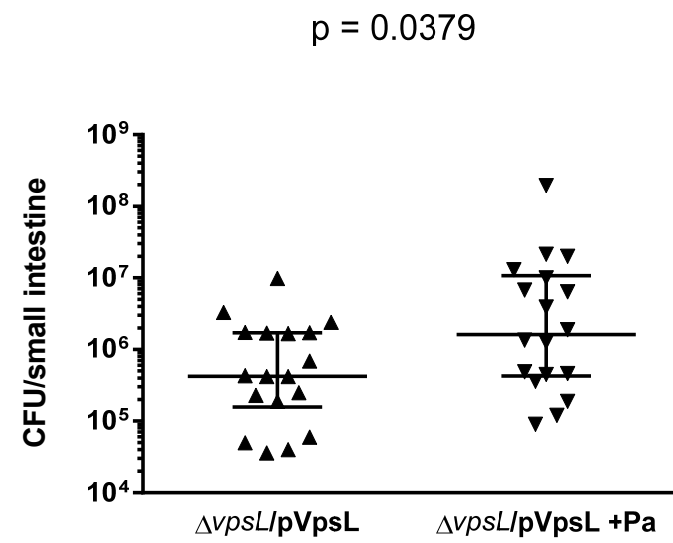

Supplement: supp [file elife-73010-supp-v1.zip]

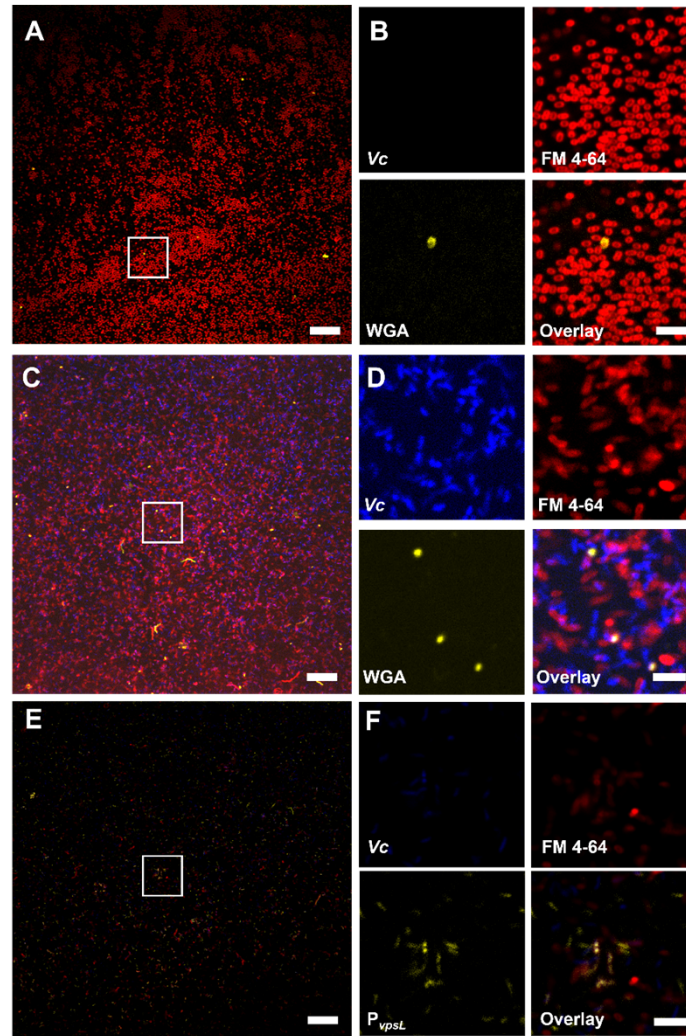

Supplement: supp [file elife-73010-supp-v1.zip]

**A**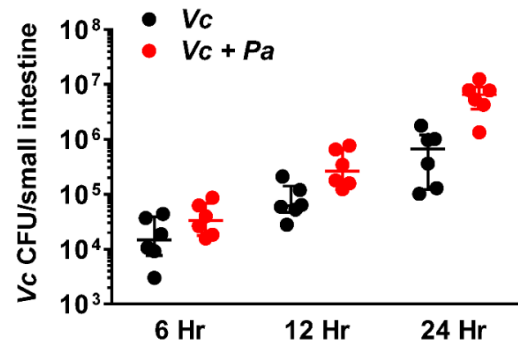**B**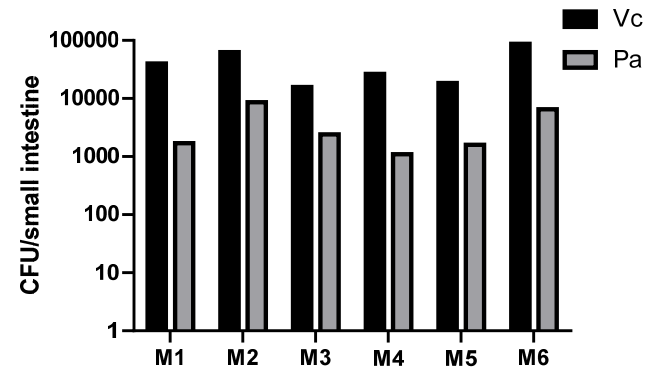**C**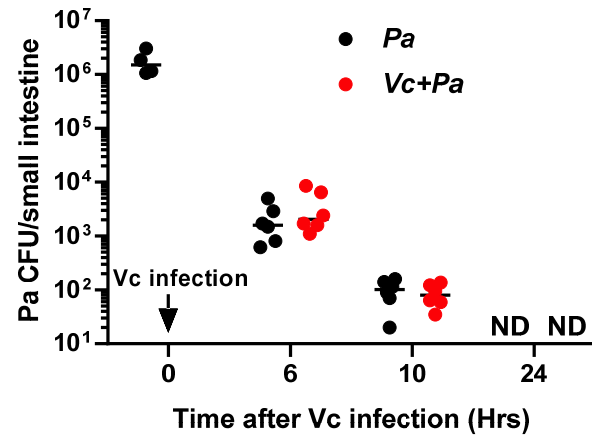

Supplement: supp [file elife-73010-supp-v1.zip]

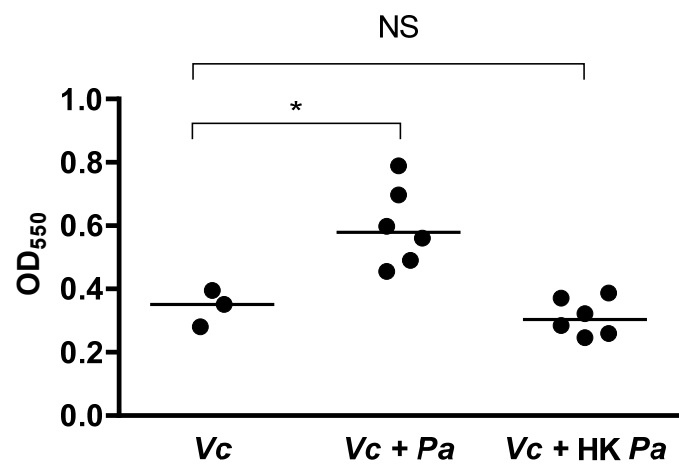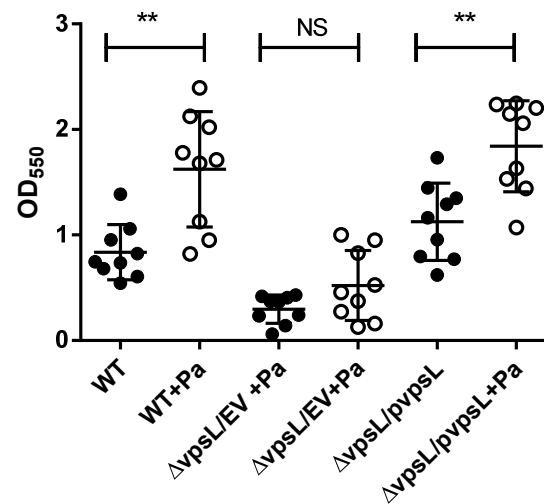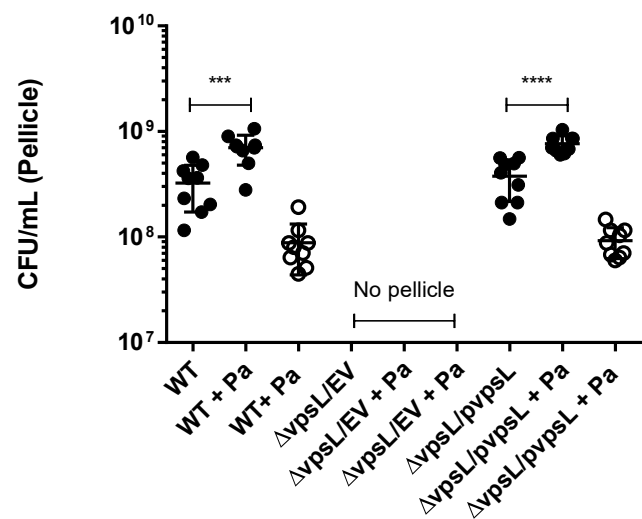

Supplement: supp [file elife-73010-supp-v1.zip]

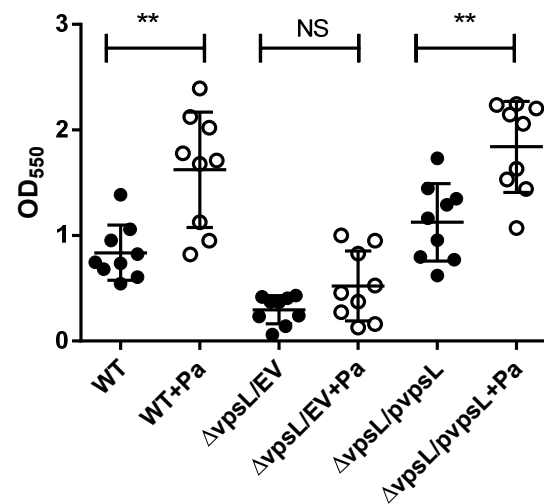

Supplement: supp [file elife-73010-supp-v2.zip]
